# Supplementary material for: Has the relationship between wealth and HIV risk in Sub-Saharan Africa changed over time? A temporal, gendered and hierarchical analysis
Source: PubMed Central journal article supplement — SSM Popul Health. 2021 May 29;15:100833. doi: 10.1016/j.ssmph.2021.100833 (PMC8184650; doi:10.1016/j.ssmph.2021.100833), 2021-05-29
Supplement: mmc2.pdf [file mmc2.pdf]

Comparison of Odds Ratios of HIV Infection in the Middle Wealth Tertile versus the Lower Tertile  
Between those living in an Urban setting v those living in a Rural setting v Unstratified results

A)

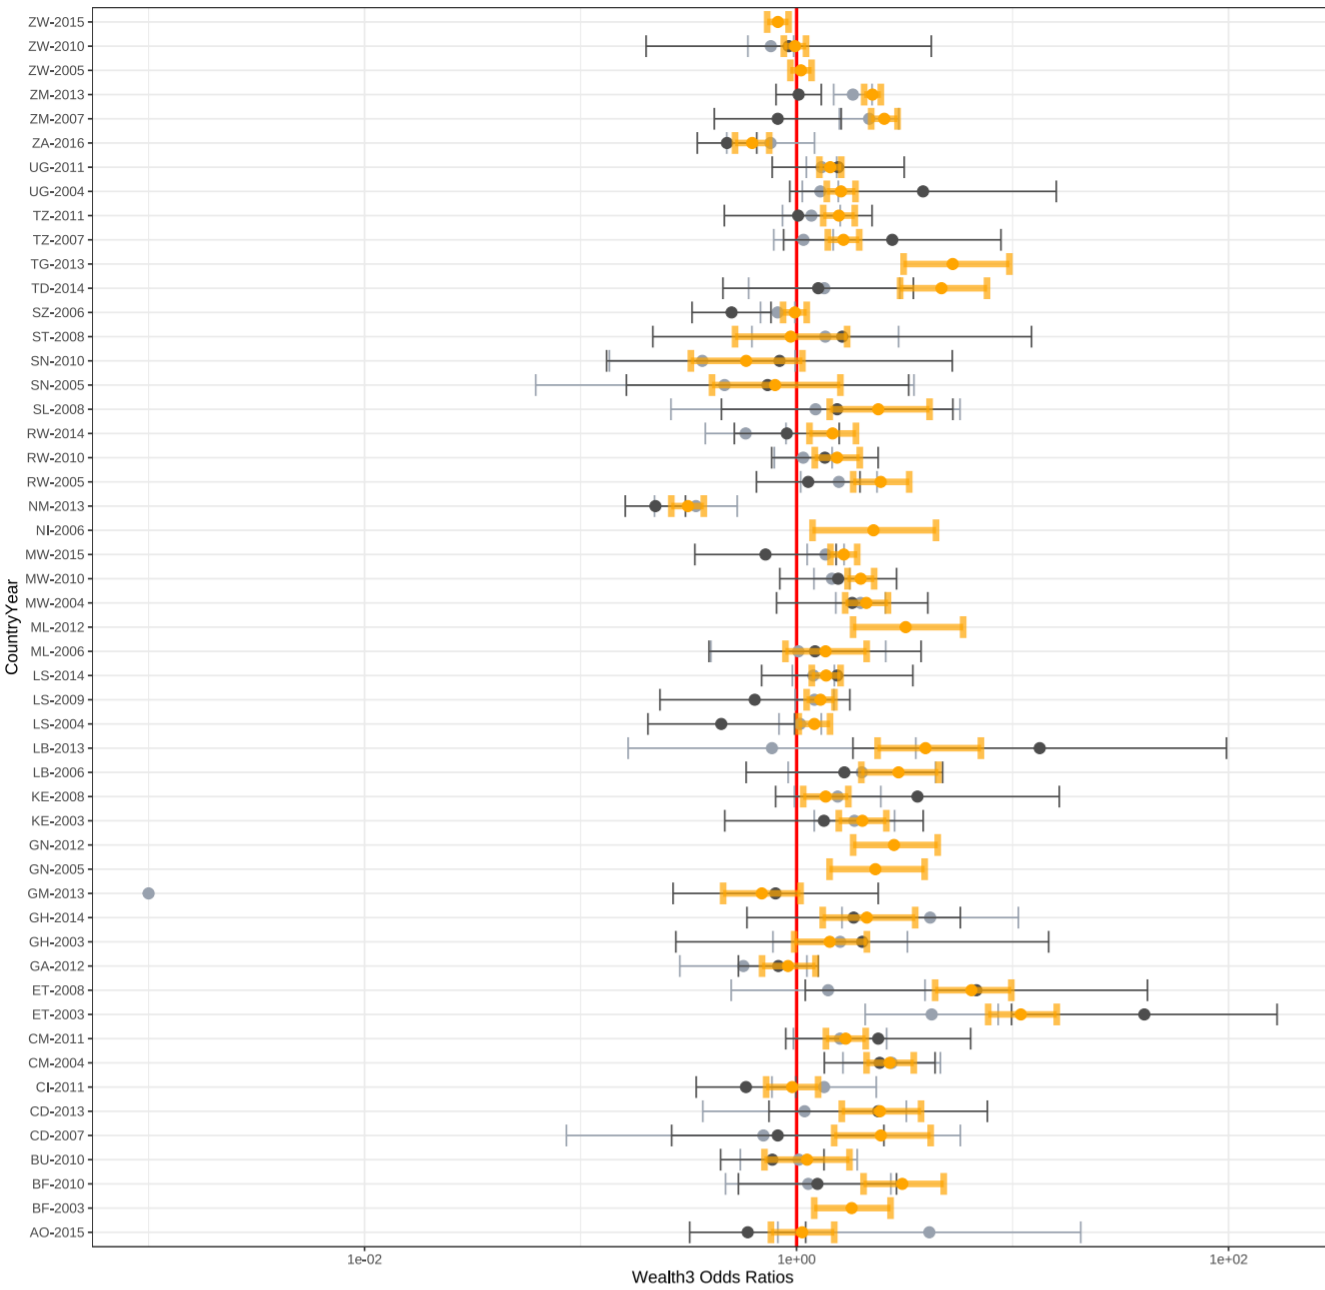

Comparison of Odds Ratios of HIV Infection in the Upper Wealth Tertile versus the Lower Tertile  
Between those living in an Urban setting v those living in a Rural setting v Unstratified results

B)

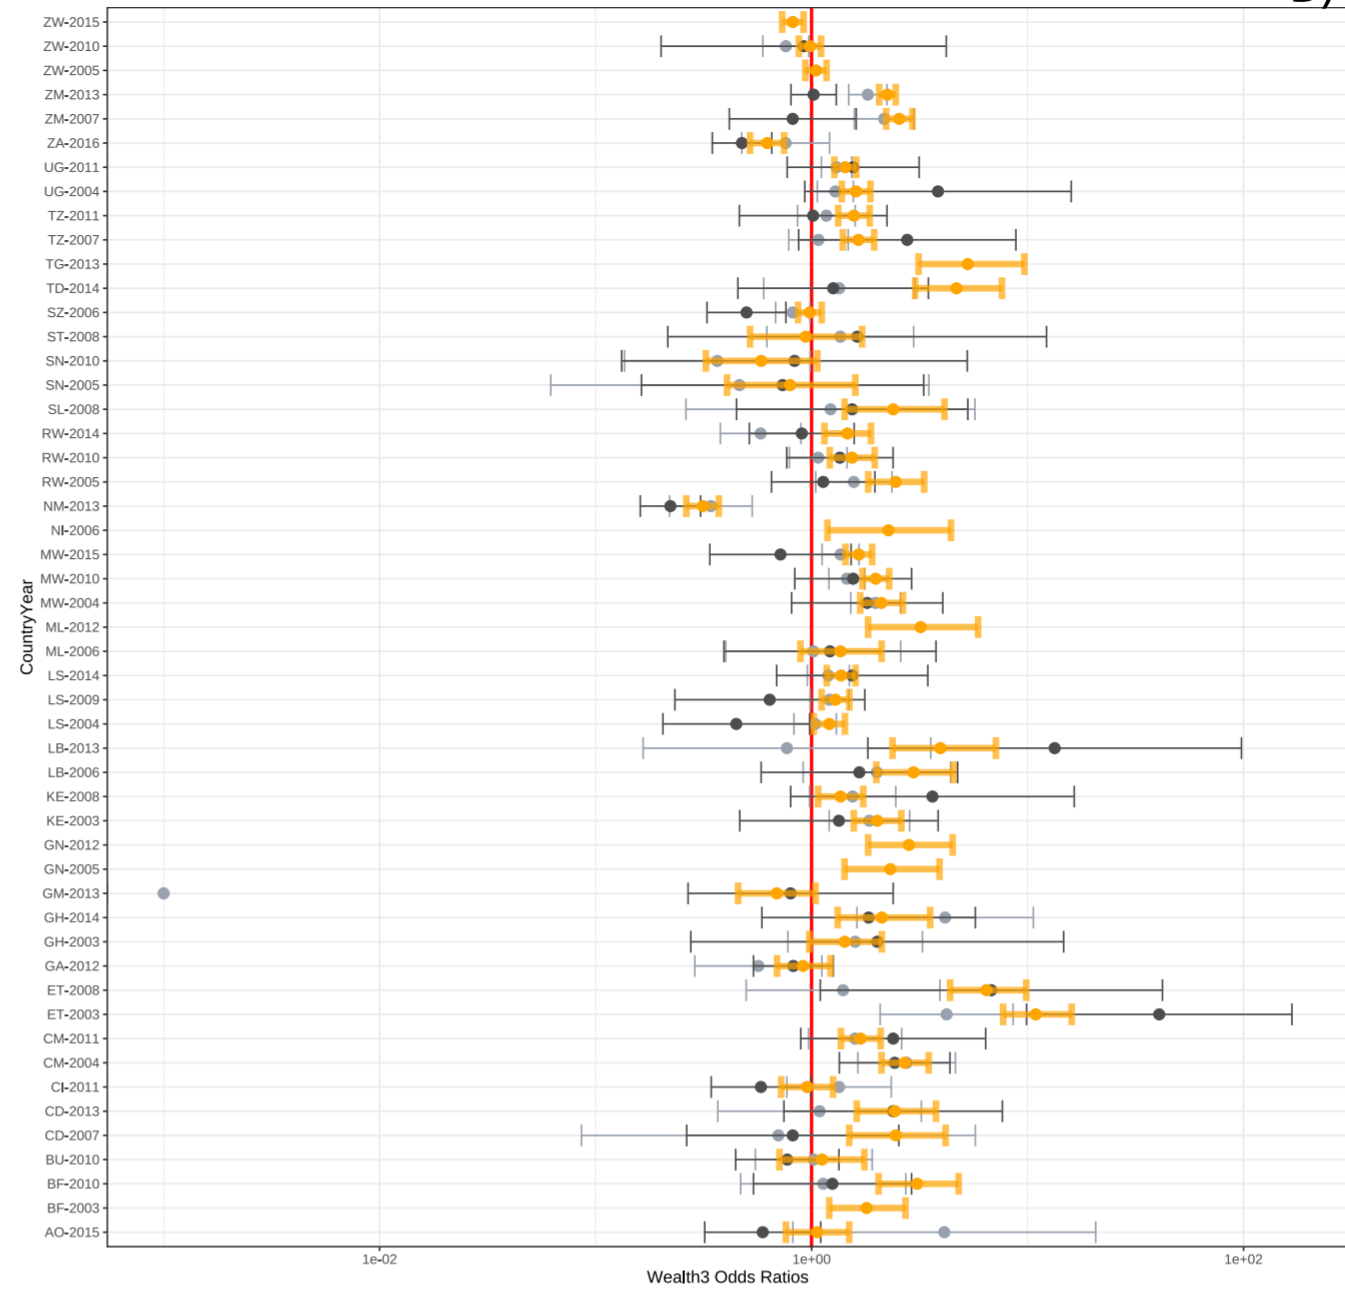

Comparison of Odds Ratios of HIV Infection in the Women versus Men  
Between those living in an Urban setting v those living in a Rural setting v Unstratified results

C)

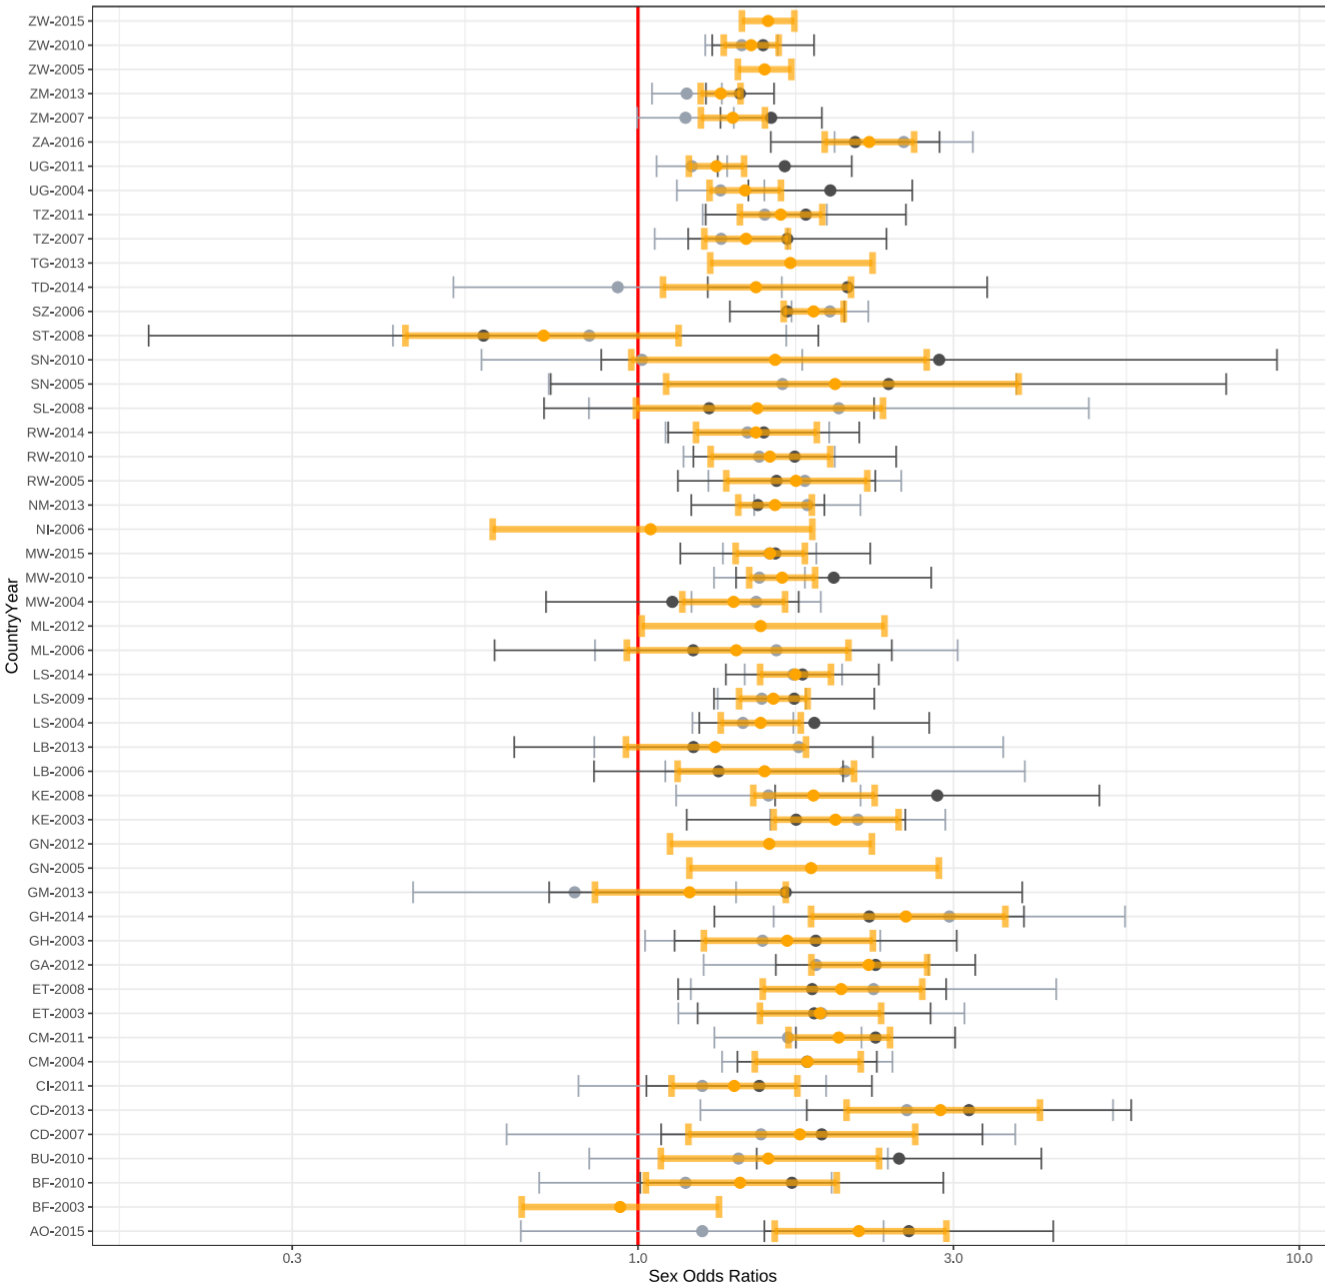

Supplementary Figure 1A-C

Comparison of the odds ratios and confidence intervals for each survey when stratified on urban (black) /rural (grey) designation and when left unstratified (orange).
